# Supplementary material for: EGFR inhibition leads to enhanced desmosome assembly and cardiomyocyte cohesion via ROCK activation
Source: PubMed Central journal article supplement (PMC10070108; doi:10.1172/jci.insight.163763), 2023-03-22
Supplement: jciinsight-8-163763-s220.pdf [file jciinsight-8-163763-s220.pdf]

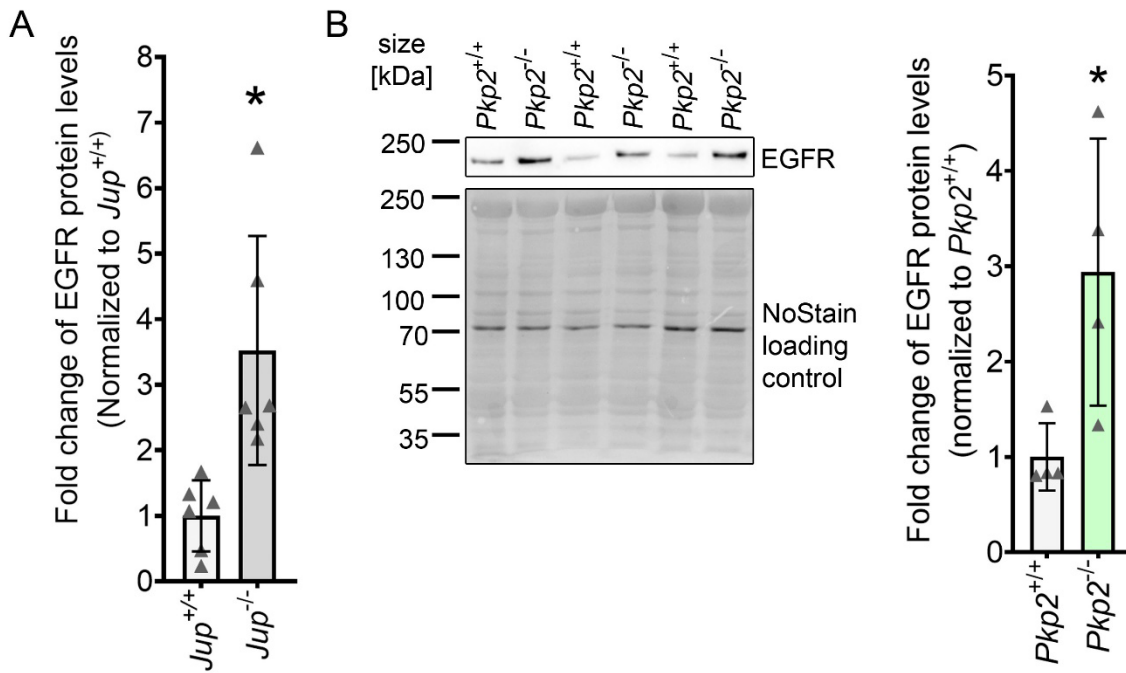

1

2 Figure S1 – Upregulation of EGFR in AC

3 **A:** Quantification of Western blots (Figure 1A) showing protein expression of EGFR in murine cardiac slices from  
 4 *Jup*<sup>+/+</sup> and *Jup*<sup>-/-</sup> mice. \*  $p \leq 0.05$  unpaired Student's *t*-test, N=6 mice. **B:** Representative Western blot showing

5 protein expression of EGFR in heart lysates obtained from *Pkp2*<sup>+/+</sup> and *Pkp2*<sup>-/-</sup> mice. NoStain™ Protein Labeling

6 Reagent was used as loading control. \*  $p \leq 0.05$ , unpaired Student's *t*-test, N=4 mice.

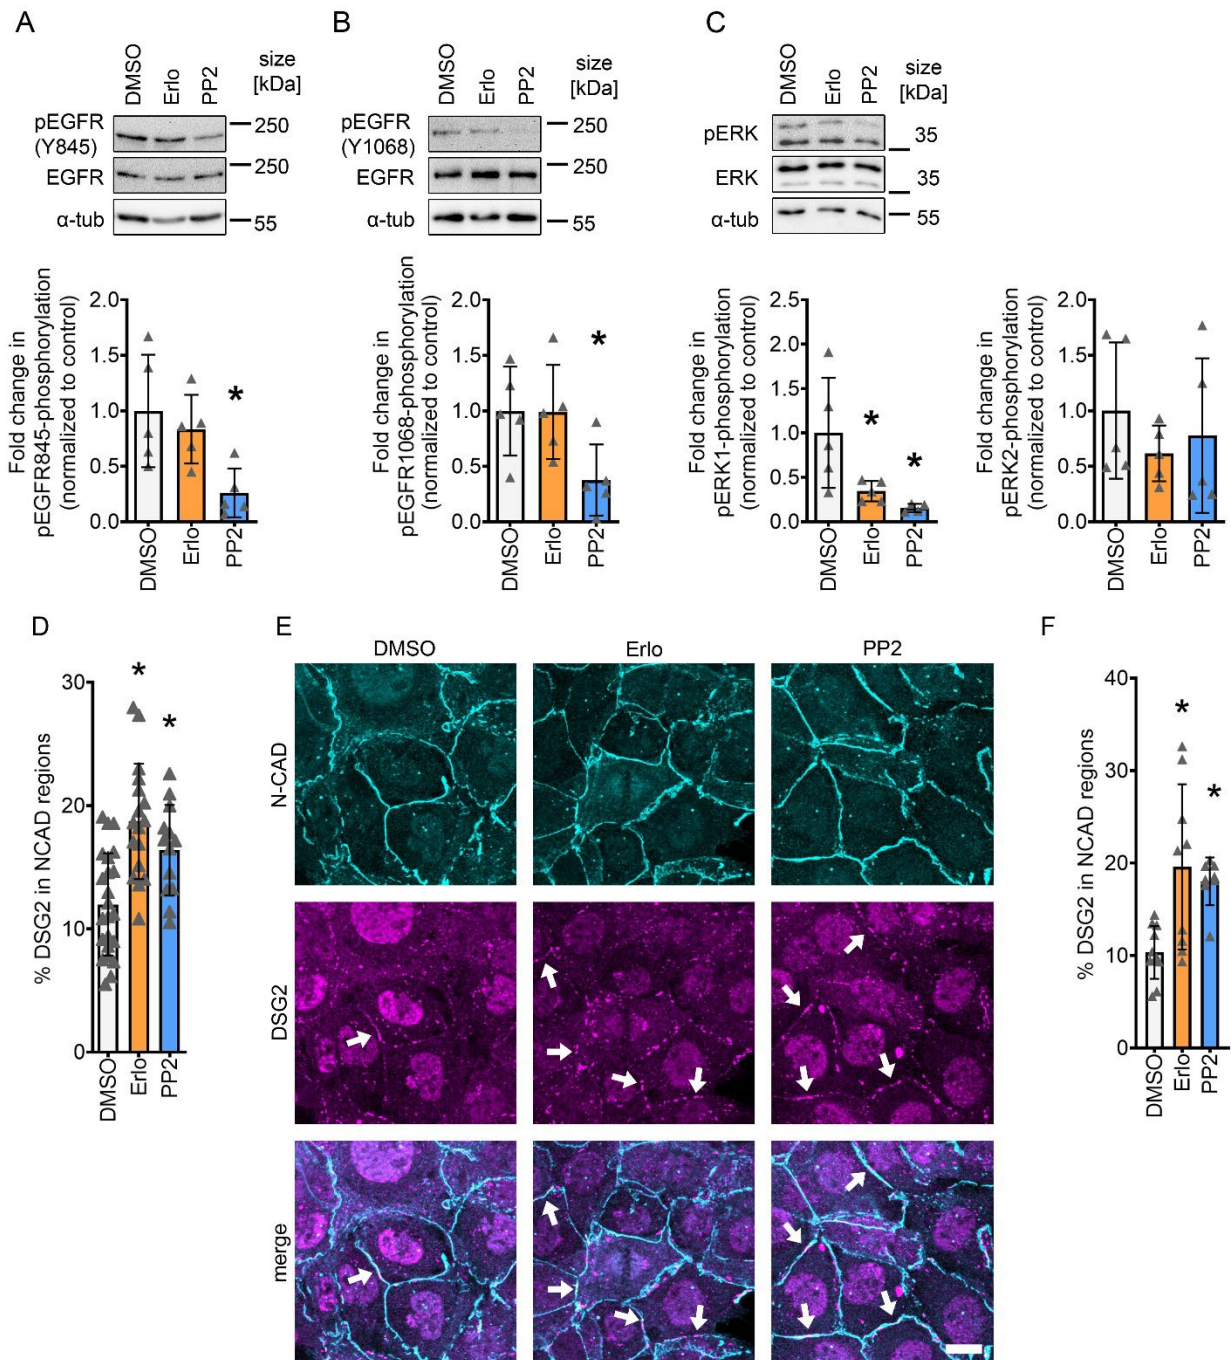

7

8 Figure S2 – confirmation of erlotinib and PP2 effect

9 **A-C:** Representative Western blots showing protein expression of phospho-EGFR **A:** Y845 and **B:** Y1068 and EGFR  
 10 and **C:** phospho-ERK1/2 and ERK in HL-1 cardiomyocytes after treatments with erlotinib or PP2. \*  $p \leq 0.05$ , 1-way  
 11 ANOVA with Holm-Sidak correction, N=5 independent experiments. **D:** Quantification of colocalization of N-CAD  
 12 and DSG2 (Progen #610121 antibody) in HL-1 cardiomyocytes (Figure 1E), \*  $p \leq 0.05$ , 1-way ANOVA with Holm-  
 13 Sidak correction. Each data point represents one area, N=5 independent experiments. **E:** Maximum projections  
 14 of immunostainings in HL-1 cardiomyocytes for N-CAD and DSG2 (ThermoFisher #PA5-79171 antibody) showing

15 an increase of DSG2 at the cell borders after erlotinib or PP2 treatments. Z-scans spanning the whole cell  
16 volume were performed using 0.25 $\mu$ m z-steps. White arrows indicate areas of increased DSG2 localization at the  
17 cell membrane. Scale bar: 10  $\mu$ m. **F:** Quantification of colocalization of N-CAD and DSG2 (ThermoFisher #PA5-  
18 79171 antibody) in HL-1 cardiomyocytes, \*  $p \leq 0.05$ , 1-way ANOVA with Holm-Sidak correction. Each data point  
19 represents one area, N=4 independent experiments.

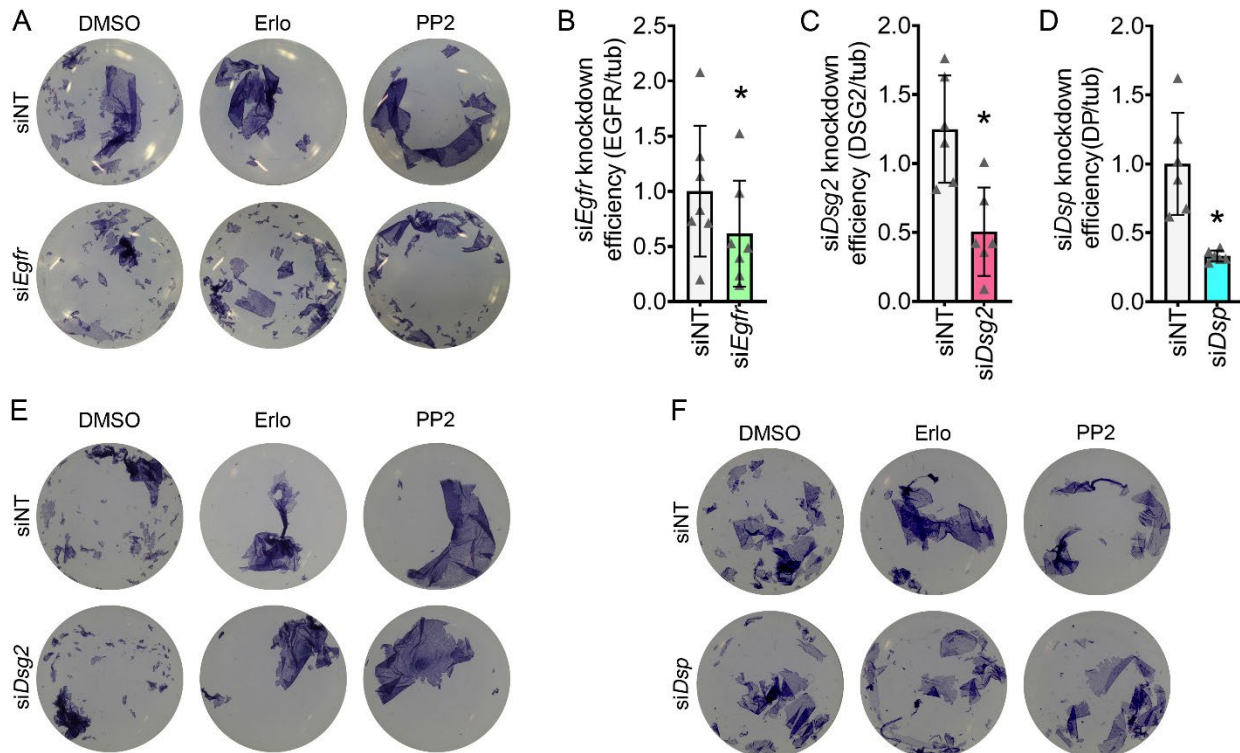

20

21 Figure S3 – Positive adhesiotropy induced by EGFR or SRC inhibition is dependent on DP

22 **A:** Representative pictures of the wells of the dispase-based dissociation assay in HL-1 cardiomyocytes after  
 23 siRNA-mediated knockdown of *Egfr* (Figure 3A-B), **B-D:** Quantification of knockdown efficiency of **B:** *Egfr* **C:** *Dsg2*  
 24 and **D:** *Dsp*. \*  $p \leq 0.05$ , paired Student's *t*-test, N=6 independent experiments. **E:** Representative pictures of the  
 25 wells of the dispase-based dissociation assay in HL-1 cardiomyocytes after siRNA-mediated knockdown of *Dsg2*  
 26 (Figure 3E). **F:** Representative pictures of the wells of the dispase-based dissociation assay in HL-1  
 27 cardiomyocytes after siRNA-mediated knockdown of *Dsp* (Figure 3E).

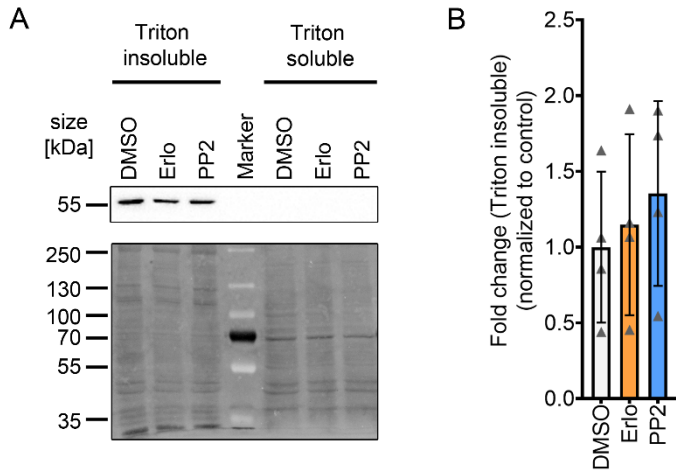

28

29 Figure S4 –DES protein levels upon EGFR or SRC inhibition

30 **A:** Representative Triton assay blots showing protein expression of DES. NoStain™ Protein Labelling Reagent  
 31 served as loading control. **B:** Quantifications of Triton assay blots for DES. Only insoluble fraction was quantified,  
 32 since no protein was detected in the Triton soluble fraction. 1-way ANOVA with Holm-Sidak correction, N=4  
 33 independent experiments.

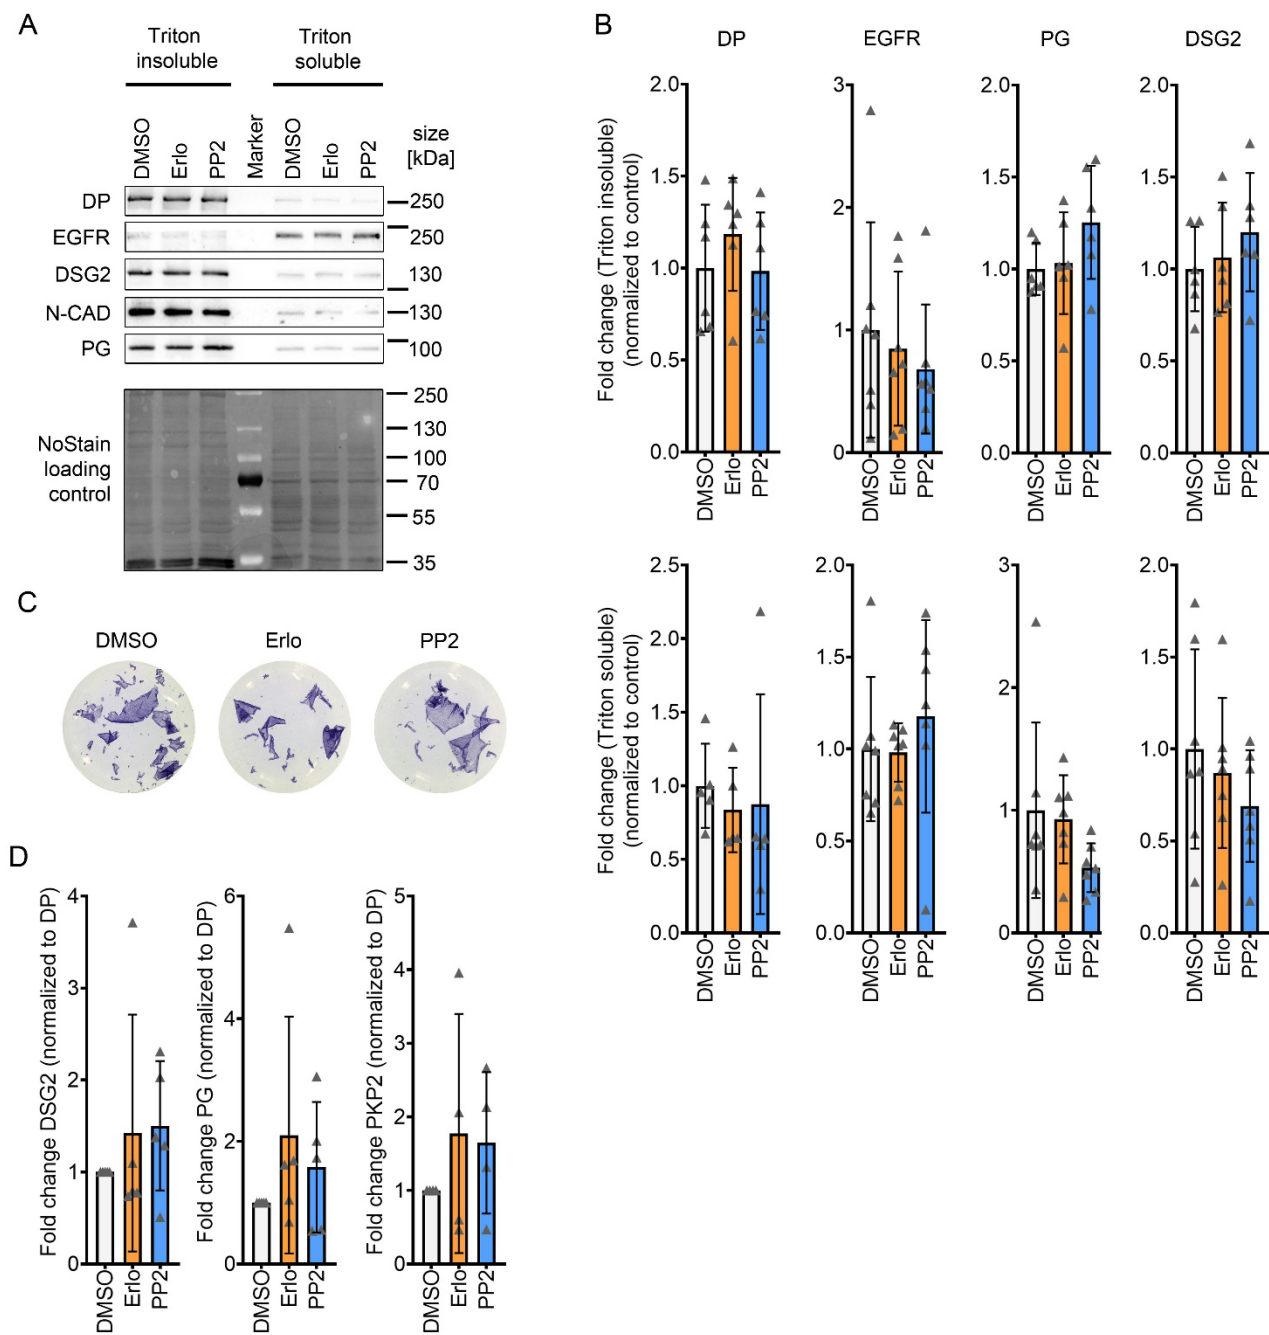

34

35 Figure S5 – EGFR or SRC inhibition do not cause changes in protein localization between detergent soluble and  
 36 insoluble fractions

37 **A:** Representative Triton assay blots for DP, EGFR, PG and DSG2, NoStain™ Protein Labelling Reagent served as a  
 38 loading control. Triton soluble fraction represents cytosolic proteins and membrane-bound proteins in Triton  
 39 insoluble fraction. **B:** Quantifications of Triton assay blots for DP, EGFR, PG and DSG2 \*  $p \leq 0.05$ , 1-way ANOVA  
 40 with Holm-Sidak correction, N=5-7 independent experiments. **C:** Representative pictures of the wells of the  
 41 disperse-based dissociation assay in HL-1 cardiomyocytes after 90 minutes of  $Ca^{2+}$ -depletion and subsequent

42 Ca<sup>2+</sup>-repletion together with erlotinib PP2. **D**: Quantification of co-immunoprecipitated proteins DSG2, PG and  
43 PKP2 in DP immunoprecipitation (Figure 7G). Due to different pulldown efficiency of immunoprecipitation,  
44 samples were normalized to the respective DMSO control, 1-way ANOVA with Holm-Sidak correction, N=4-5  
45 independent experiments.

46

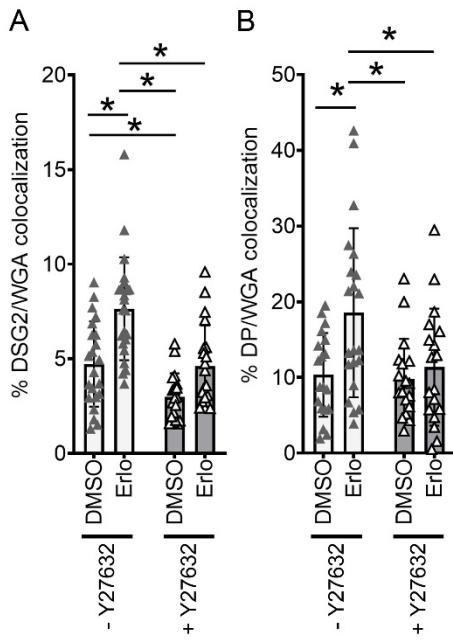

47

48 Figure S6 – Enhanced DSG2 and DP localization at the membrane is abolished upon inhibition of ROCK

49 Quantification of colocalization of **A**: DSG2 and WGA or **B**: DP and WGA (Figure 8E), \*  $p \leq 0.05$ , 2-Way ANOVA

50 with Holm-Sidak's multiple comparison test, N=5 independent experiments. Each data point represents one

51 area.

52



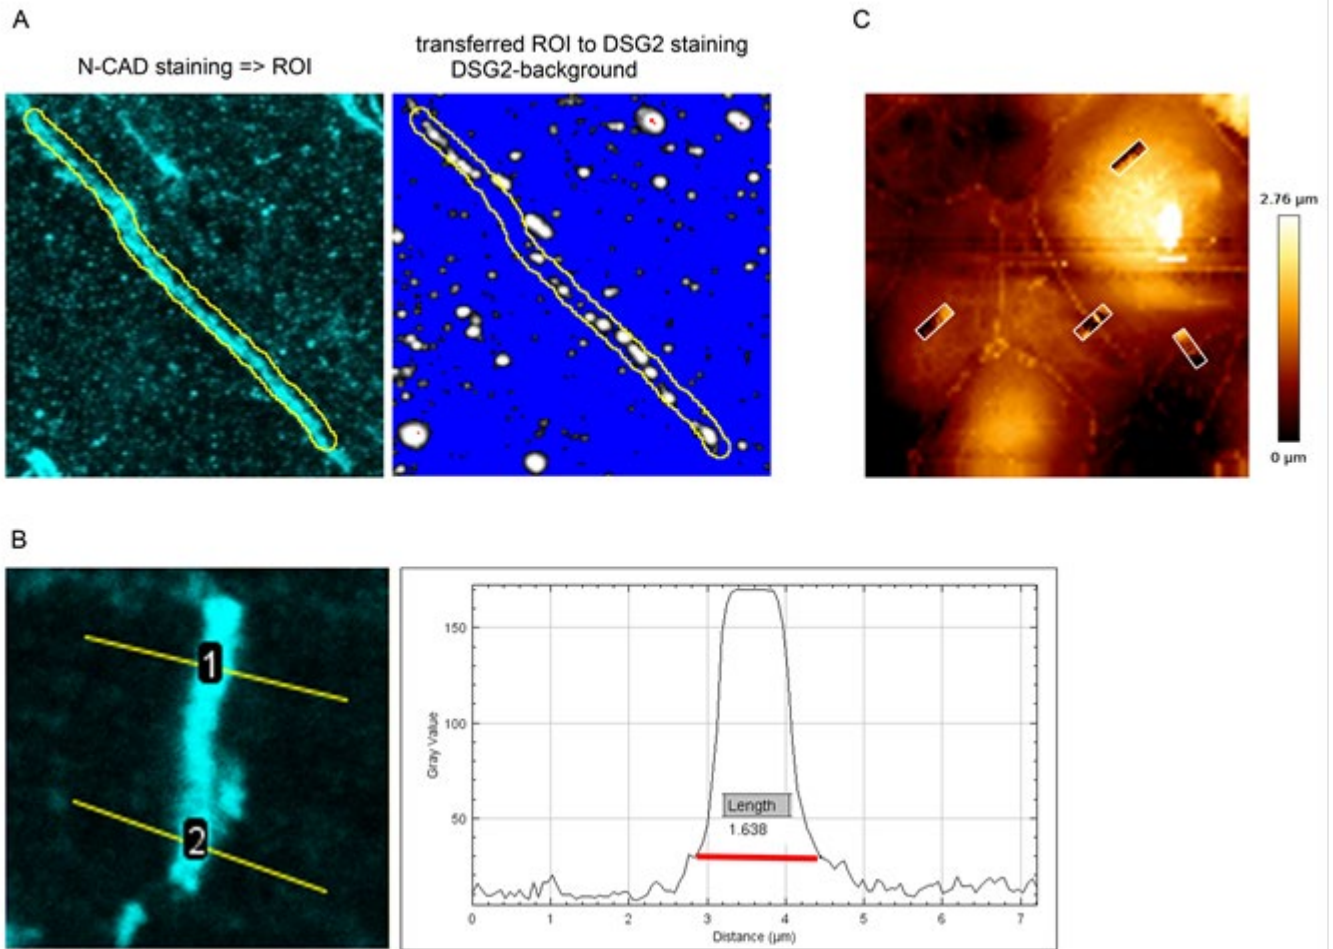

53

54 Figure S7 – Methods and quantifications explained

55 **A:** Quantification method for colocalization in immunostainings. The region of interest was chosen using N-CAD,  
 56 and transferred to the image of the DSG2 staining. In this region, the amount of stained pixels was measured  
 57 and a ratio DSG2 to N-CAD at the membrane was calculated. **B:** Quantification method for DP or DSG2  
 58 immunostaining width in murine cardiac slices. The width of respective protein staining was measured in two  
 59 areas per ICD, the average values were calculated. WGA staining was used in order to orient the ICDs. Staining  
 60 width was measured in areas, where WGA, DP and DSG2 staining was present. The measurements were  
 61 performed using ImageJ as shown. **C:** Representative QI topography image of HL-1 cells with chosen areas for  
 62 AFM measurements at cell borders and cell surfaces.

63

64 Table S1

65 PamGene Kinase assay after 15, 30 and 60 minutes of erlotinib treatment. Samples were compared to  
66 respective control-treated specimen. N=3 independent experiments. Kinase activity was considered to be  
67 altered, when the mean specificity score was above 1 and the significance score above 0.5
